# Supplementary material
Source: HighWire-hosted journal article supplement (https://erj.ersjournals.com/content/60/1/2102333)
Supplement: inline-supplementary-material-1 [file inline-supplementary-material-1.pdf]

# Phenotype and severity of asthma determines bronchial epithelial immune responses to a viral mimic

Porsbjerg C<sup>\*1,2,3</sup>, Nieto-Fontarigo JJ<sup>\*4</sup>, Cerps S<sup>4</sup>, Ramu S<sup>4</sup>, Menzel M<sup>1,3,4,5</sup>, Hvidtfeldt M<sup>1,2</sup>, Silberbrandt A<sup>1,2</sup>, Froessing L<sup>1,2</sup>, Klein D<sup>1,2</sup>, Sverrild A<sup>1,2</sup>, Uller L<sup>4</sup>

<sup>1</sup>Respiratory Research Unit, Department of Respiratory Medicine, Bispebjerg Hospital, Copenhagen, Denmark

<sup>2</sup>Center for Translational Research, Bispebjerg Hospital, Copenhagen, Denmark

<sup>3</sup>Institute for Clinical Medicine, University of Copenhagen, Copenhagen, Denmark

<sup>4</sup>Respiratory Immunopharmacology, University of Lund, Lund, Sweden

<sup>5</sup>Skin Immunology Research Center, University of Copenhagen, Copenhagen, Denmark

\*Both authors contributed equally to the manuscript

## ONLINE SUPPLEMENTARY TABLES

**Supplementary Table S1. List of primers used in qPCR analyses**

| <b>Gene</b>                   | <b>Primer</b> | <b>Sequence</b>             |
|-------------------------------|---------------|-----------------------------|
| <b>IFN-<math>\beta</math></b> | Sense         | -TTACTTCATTAACAGACTTACAGGT- |
|                               | Antisense     | -TACATTAGCCATCAGTCACTTAAAC- |
| <b>IL-8</b>                   | Sense         | -CAGAGACAGCAGAGCACAC-       |
|                               | Antisense     | -AGCTTGGAAGTCATGTTTACAC-    |

## ONLINE SUPPLEMENTARY FIGURES

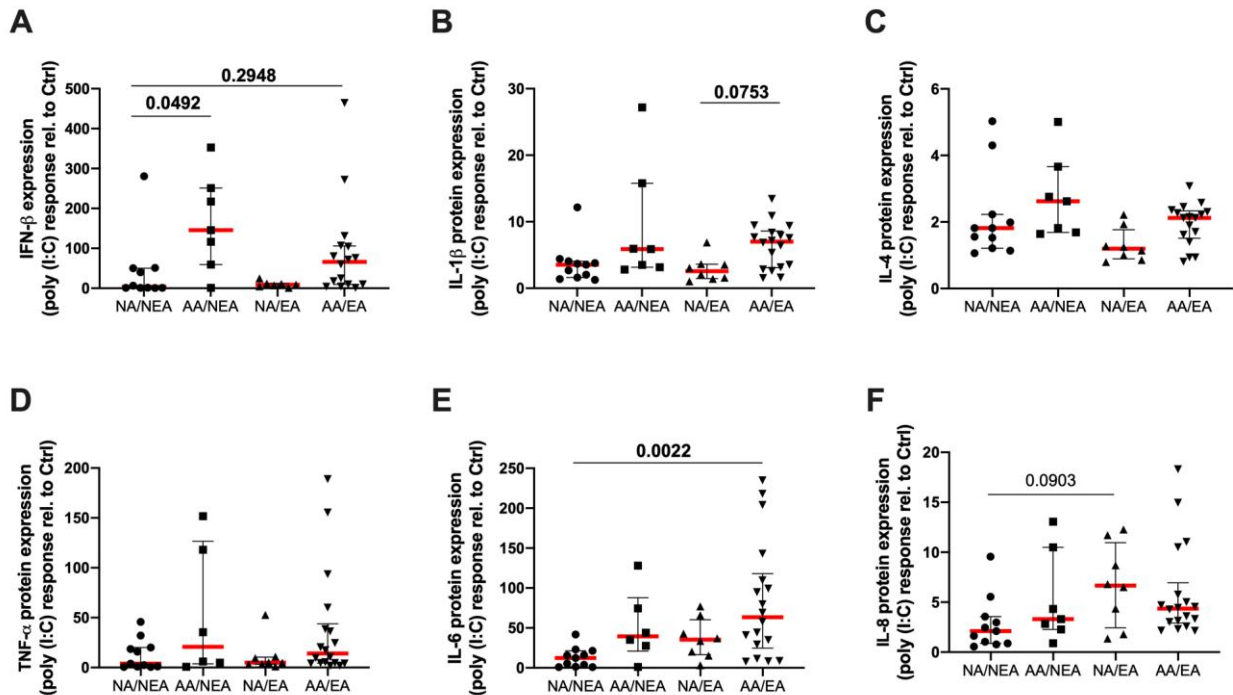

**Supplementary Figure S1. Predominant effect of atopy in the immunoreactivity responses of the bronchial epithelium to poly I:C stimulation.** IFN- $\beta$  (A), IL-1 $\beta$  (B), IL-4 (C), TNF- $\alpha$  (D), IL-6 (E), and IL-8 (F) protein release in cell culture supernatants of human bronchial epithelial cells (HBECs) from asthmatic patients with different asthma phenotypes: non-atopic/non-eosinophilic (NA/NEA; N = 11), atopic/non-eosinophilic (AA/NEA; N = 7), non-atopic/eosinophilic (NA/EA; N = 8), and atopic/eosinophilic (AA/EA; N = 18). All data is expressed as log<sub>2</sub> fold-change expression of poly (I:C) stimulated HBECs relative to unstimulated cells. Kruskal Wallis with Dunn's multiple comparison test. Outliers have been removed using the ROUT test with Q set at 0.1%. Numbers on the graph represent p-values.

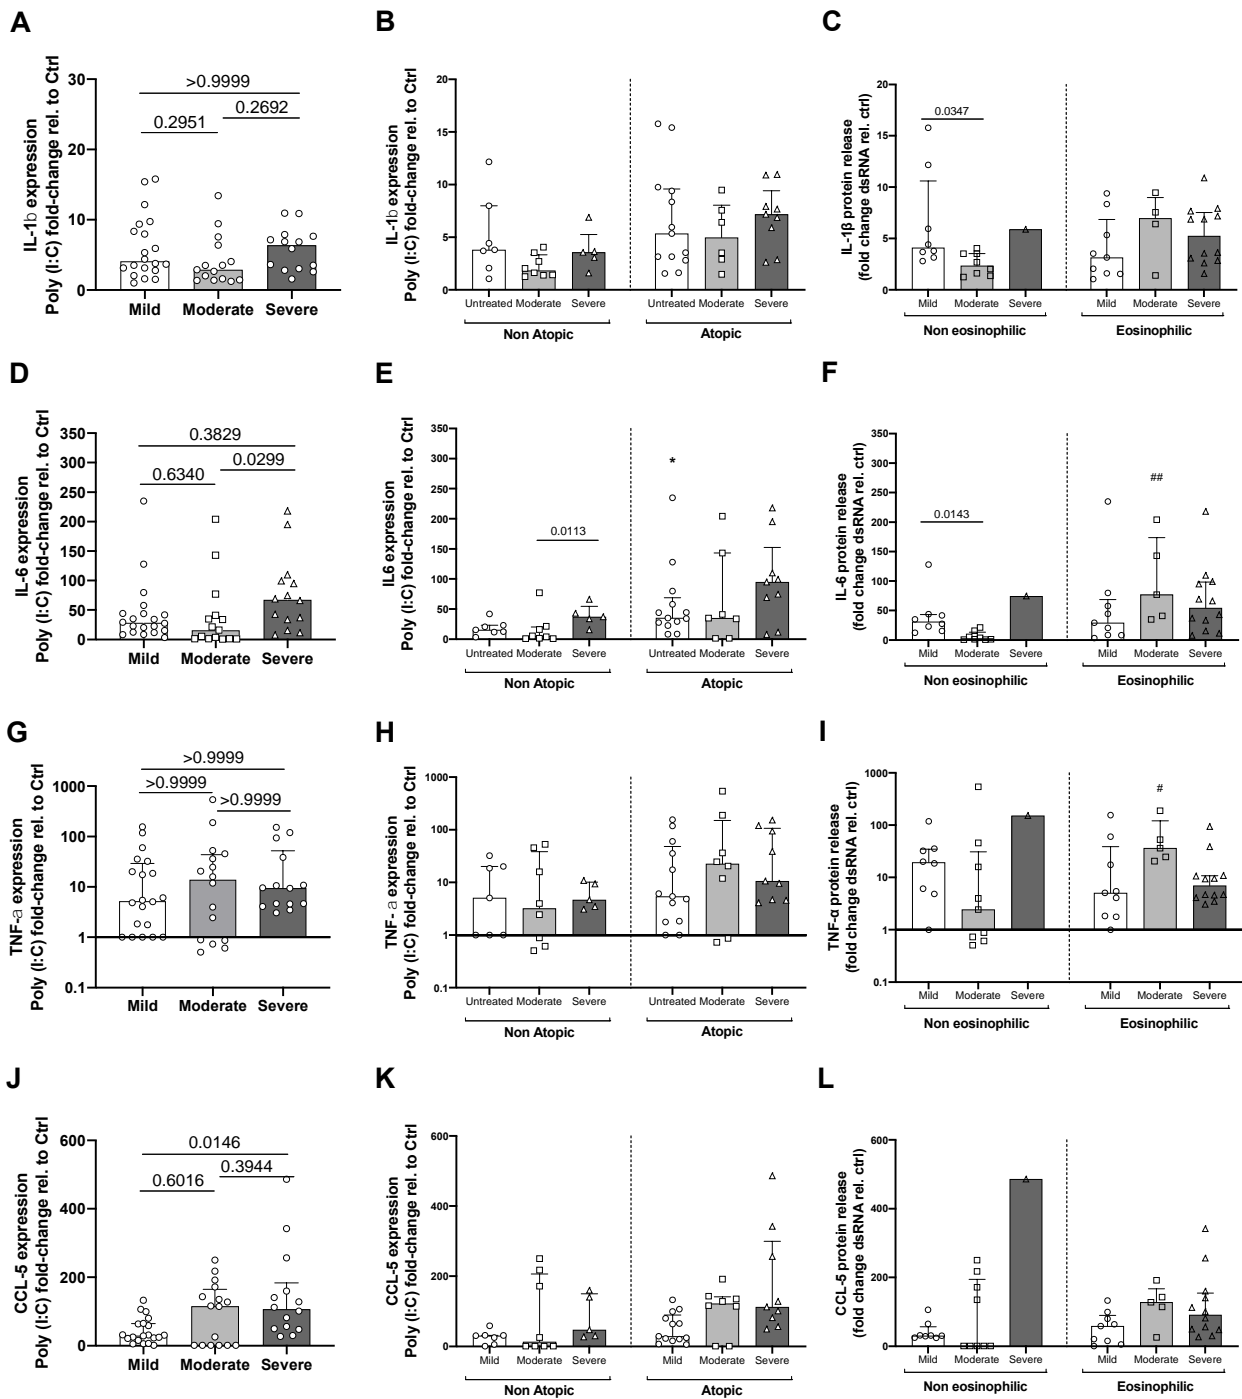

**Supplementary Figure S2. Impact of severity on proinflammatory response of bronchial epithelium to the viral stimulation.** IL-1 $\beta$  (A-C), IL-6 (D-F), TNF- $\alpha$  (G-I), and CCL-5 (J-L) release in cell culture supernatants of human bronchial epithelial cells (HBECS) from asthmatic patients with different severity degrees (Mild, N = 20; Moderate, N = 16; Severe, N = 14) in response to 24h poly (I:C)-stimulation in the overall study population, or within the different asthma phenotypes: Atopic (Mild, N = 13; Moderate, N = 8; Severe, N = 9) vs non atopic (Mild, N = 7; Moderate, N = 8; Severe, N = 5) (B, E, H, K), and eosinophilic (Mild, N = 9; Moderate, N = 5; Severe, N = 12) vs. non-

eosinophilic (Mild, N = 8; Moderate, N = 9; Severe, N = 1) (C, F, I, L). All data is expressed as log<sub>2</sub> fold-change expression of poly (I:C) stimulated HBECs relative to unstimulated cells. Kruskal Wallis with Dunn's multiple comparison test. Outliers have been removed using the ROUT test with Q set at 0.1%. Numbers on the graph represent p-values. \*p<0.05 mild atopic vs mild non-atopic; #p<0.05 moderate eosinophilic vs moderate non-eosinophilic; Mann-Whitney U test.
